# Supplementary material for: An intein-mediated modulation of protein stability system and its application to study human cytomegalovirus essential gene function
Source: PubMed Central journal article supplement (PMC4870628; doi:10.1038/srep26167), 2016-05-18
Supplement: srep26167-s1.pdf [file srep26167-s1.pdf]

**An intein mediated modulation of protein stability system to study  
human cytomegalovirus essential gene function**

**Deng Pan,<sup>1,+</sup> Baoqin Xuan,<sup>1,+</sup> Yamei Sun,<sup>1</sup> Shaowu Huang,<sup>1,2</sup> Maorong Xie,<sup>1,3</sup>**

**Yadan Bai,<sup>1,3</sup> Wenjia Xu,<sup>1</sup> and Zhikang Qian<sup>1,\*</sup>**

<sup>1</sup> Unit of Herpesvirus and Molecular Virology, Key Laboratory of Molecular Virology

& Immunology, Institut Pasteur of Shanghai, Chinese Academy of Sciences,

Shanghai, China

<sup>2</sup> Institutes for Advanced Interdisciplinary Research, East China Normal University,

Shanghai, China

<sup>3</sup> Jiangsu Key laboratory of infection and Immunity, Institutes of Biology and Medical

Sciences, Soochow University, Suzhou, China

\* Corresponding author: [zkqian@ips.ac.cn](mailto:zkqian@ips.ac.cn) (ZQ)

<sup>+</sup> These authors contributed equally to this work

## Supporting Information

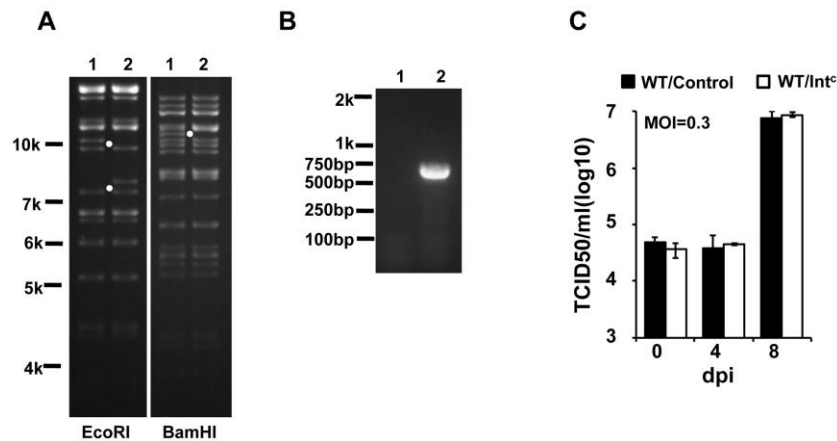

**Supplementary Figure 1.** Construction of pADddIE recombinant virus. (A)

Restriction digestion of WT (1) and pADddIE (2) virus BAC genome by EcoRI or

BamHI showed the expected bands, indicated by white dots. (B) PCR amplification

using one primer corresponding to the ddFKBP-Int<sup>C</sup> coding sequence and the other

from the IE1/2 coding sequence gave bands for pADddIE-containing virus only. (C)

A multiple step growth curve was performed to examine the growth kinetics of wild

type (WT) on MRC-5 control cells (WT/Control) or Int<sup>C</sup>-flag-expressing cells (WT/

Int<sup>C</sup>).

**gp41**

accgcagcggctactgctgacctgaagaaccagggtgcagacccccagggcatgaaggagatcagcaacatccagggtggcgacct  
 ggtgctgagcaacaccggctacaacagaggtgctgaacgtgtcccaagagcaagaagaagagctacaagatcaccctggaggacggca  
 aggagatcatctgcagcgaaggagcaacctgtccccaccagaccggcgagatgaacatcagcggcgctgaaaggggcatgtgcctgt  
 acgtgaaggagatgatgctgaagaagatcctgaagatcaggagctggacgagcgcgagctgatcagatcagggtagcggcaaccac  
 ctgttctacgccaacgacatcctgacccaacaacagcagcagcagcgcgctg

**SopE**

atgaccaagatcaccctgagccccagaacttcgcatccaagaagcaggagaccacccctgctgaaggagaagagcaccgagaagaaca  
 gcctggccaagagatcctggcgtgaagaaccactcatcagctgctgcagcaagctgagcgagcgtctcatcagccacaagaacaccg  
 agagcagcggcaccactccaccgcgacgcgcagcgcgagggccgcgctgtgctgaccaacaagggtgtgaaaggacttcatgctcag  
 accctgaacgacatcagatccggcagcggcc

**ER50**

agcctggcctgagcctgaccgaccagatggtgagcgcctgctggacgcccagccccatcctgtacagcagagtagcagccccacc  
 cgcccttcagcagggccagcatgatggcctgctgaccaaactggccgaccgcgagctggtgcacatgatcaactggccaaagcgcgtgc  
 ccggcttcgtggaactggcctgcacgaccaggtgcacctgctggagtgcgctggatggagatcctgatgatcggcctggtgtggcgcagca  
 tggagcaccggcgaagctgtgttcgcccccaactgctgctggaccgcaaccaggcgaagtgcgtggaaggcggtggagatattcga  
 catgctgctggccaccagcagcgttcgcatgatgaaactgcaaggcgagggttcgtgctgaagagcatcatcctgtaaacgcg  
 gcgtgtacacctcctgagcagcaccctgaagagcctggaggagaaggaccacatccaccgctgctggaacaagatcaccgacaccctgat  
 ccacctgatggccaaggcggcctgacctgcagcagcagcaccagcgcctggcccagctgctgctgatcctgagccacatccgccacatg  
 agcagcaagcgcctgagcaccctgtacagcatgaagtcaagaactggtgcccctgagcagcctgctgctggaagatgctggacgcccac  
 cgctg

**Supplementary Figure 2. DNA sequences of synthesized gene fragments.**

| Transcript | qPCR reaction | Primer sequence (5'-3')                           |
|------------|---------------|---------------------------------------------------|
| UL27       | SYBR green    | GCTCAGAACCCCGTGCAAC<br>GCAGAAGGTCTCCACGAACG       |
| UL29       | SYBR green    | CATCTCATTGGCACGGTCTCG<br>CAACTCGTACAGGCAGTCTCTC   |
| UL38       | SYBR green    | CCTACGACTCCGGTATCCTGT<br>GTTCCAATACTCCAGCACGATAGC |
| UL117      | SYBR green    | CCCATGATCGACCTTACCA<br>AATGTAGGTGGCGTTACCG        |
| US2        | SYBR green    | CCTGCCCGATGGAATCACTAA<br>CTTGCCGTTGTCAATGTAGCAC   |
| US11       | SYBR green    | TCACGATTAAGTCGGCGCAGT<br>AATGTCGGTGCAGCCAACCTT    |
| US23       | SYBR green    | AGGTAATCCACGACGCCTTG<br>ACGTTGTTTTCTTCGGGTTCCA    |
| US24       | SYBR green    | TACAGCAGTTACACCGCATTTG<br>GTCACGCCTAGCACATACCA    |
| GAPDH      | SYBR green    | CTGTTGCTGTAGCCAAATTCGT<br>ACCCACTCCTCCACCTTTGAC   |

**Supplementary Table 1. Primer sequences used for RT-qPCR.**
